# Supplementary material for: Emerging Biocide Resistance in Staphylococcus aureus: Cross-Source Insights and Public Health Implications
Source: Research Square preprint supplement (doi:10.21203/rs.3.rs-8057258/v1), 2025-12-01
Supplement: Supplementary file 1 [file 69c179fe8f227efb82573270.docx]

**Table 2.** The Amplification Program for PCR .

| **Steps** | **Temperatures and Times** | **Cycles** |
| --- | --- | --- |
| Initial denaturation | Four min at 94°C | 1 |
| Denaturation | One min at 94°C | 32 |
| Annealing | One min (temperatures are shown for each primer in Table 1 ) | 32 |
| Extension | One min at 72°C | 32 |
| Final extention | Five min at 72°C | 1 |
