# Supplementary material for: Emerging Biocide Resistance in Staphylococcus aureus: Cross-Source Insights and Public Health Implications
Source: Research Square preprint supplement (doi:10.21203/rs.3.rs-8057258/v1), 2025-12-01
Supplement: Supplementary file 2 [file 8996dd23892aae07d8cbeb62.docx]

Table 1. Sequence of primers used for amplification of BTA genes and molecular validation of isolates.

| **Annealing T (°C)** | **Product Size (bp)** | **Primer Sequence (5′-3)** | **Primer** | **Gene** |
| --- | --- | --- | --- | --- |
| 60 | 694 | GCATTACCTGCTTTTGATGTAGG | F | *qacA/B* |
| CAAGTTCTGATCCAATGTTAGACG | R |
| 61 | 158 | TTGGAAGTGCATTTCTTAAATCTTC | F | *qacC* |
| TAAACCTAGTCCCGCCCAAG | R |
| 51 | 250 | CAGAAGGCTTTTCAAAATTTATACC | F | *qacD* |
| GATGTTCCGAAAATGTTTAACG | R |
| 53 | 266 | CACTACTTTCGTTTGGAATTTGC | F | *qacG* |
| CCAAATACATTTAAGAGCACTACACC | R |
| 51 | 222 | CATTAGGCACACTTATTTCATTCG | F | *qacJ* |
| TTGATCCAAAAACGTTAAGAAGC | R |
| 58 | 522 | TCGTGGAAAAGAAAAATAACAGC | F | *norA* |
| TGTGAAACTTCTGCCATAAATCC | R |
| 59 | 560 | GCGGGTTATTGTATGGAACG | F | *mdeA* |
| TGTCATAGATGAACCGTGTGC | R |
| 59 | 561 | GCGAGAGGTGAAACGTTAGC | F | *mepA* |
| TTTCATACGGCCTTTATTTGC | R |
| 59 | 359 | TTTACTTTCAGGGTAAAATTGAAGC | F | *sepA* |
| CATTTCTAGGGTTTGGTTTATATGG | R |
